# Supplementary material for: Update in the methodology of the chronic stress paradigm: internal control matters
Source: Springer Nature journal article supplement (doi:10.1186/1744-9081-7-9), 2011-01-01

## A SUCROSE PREFERENCE

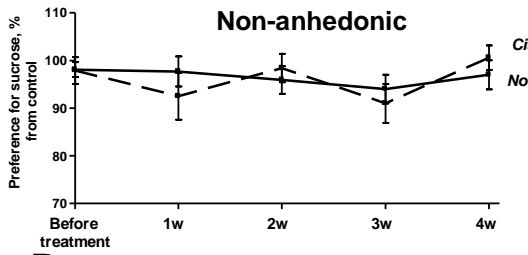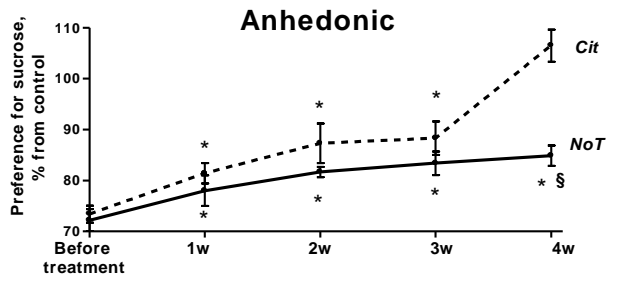

## B SUCROSE INTAKE

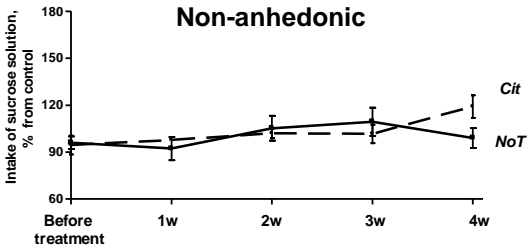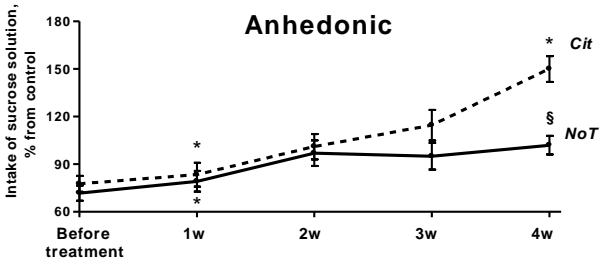

## C WATER INTAKE

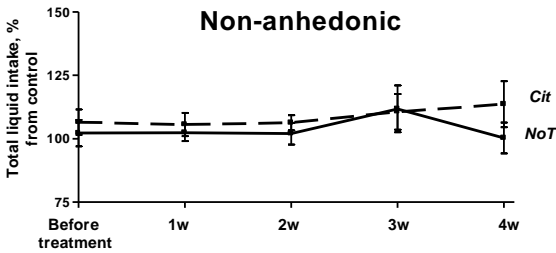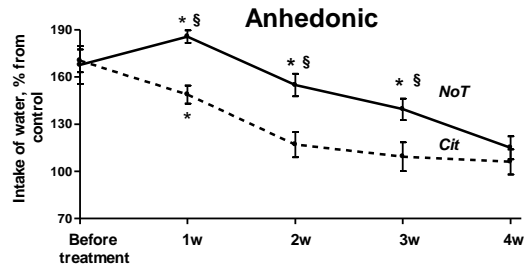

## D TOTAL LIQUID INTAKE

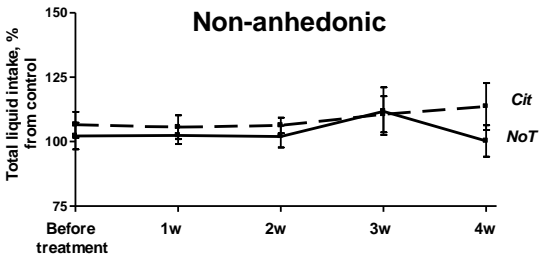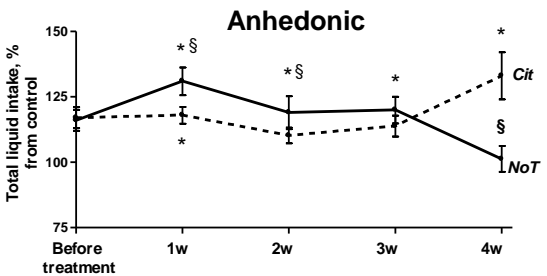

## E BODY WEIGHT

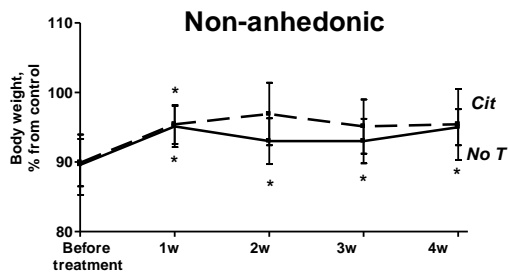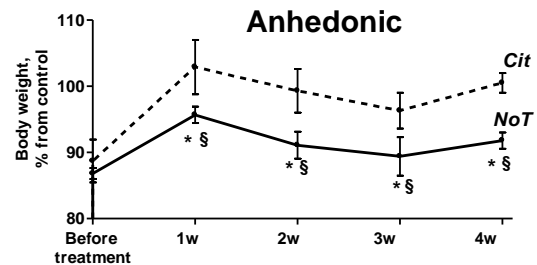

Supplement: 12993_2010_329_MOESM5_ESM.pdf [file 12993_2010_329_MOESM5_ESM.pdf]
