# Supplementary material for: Update in the methodology of the chronic stress paradigm: internal control matters
Source: Springer Nature journal article supplement (doi:10.1186/1744-9081-7-9), 2011-01-01
Supplement: 12993_2010_329_MOESM12_ESM.pdf [file 12993_2010_329_MOESM12_ESM.pdf]

**A** Sucrose test, after-stress period

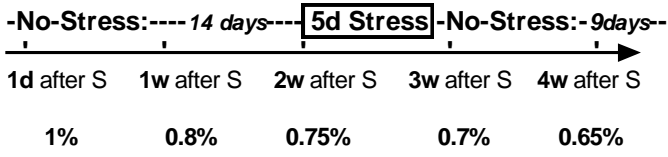

**B** 1 Day after Stress

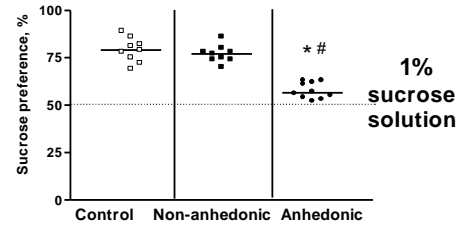

**C** 1-w after Stress

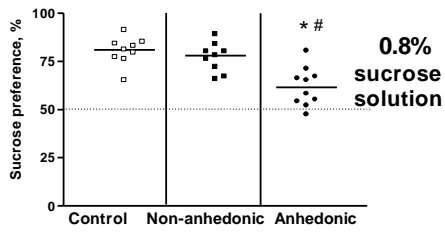

**D** 2-w after Stress

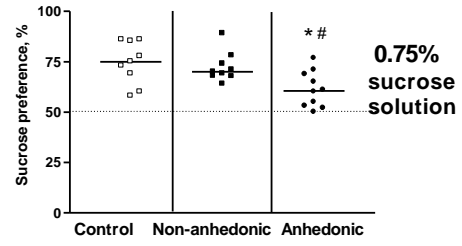

**E** 3-w after Stress

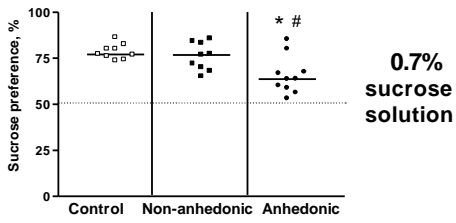

**F** 4-w after Stress

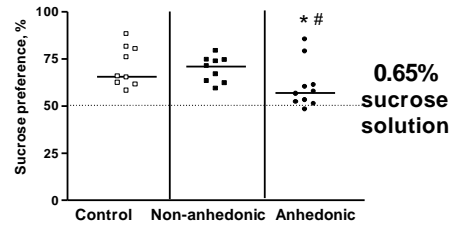

**Figure 13**
